# Supplementary material
Source: PubMed Central journal article supplement (PMC4347376)
Supplement: SD6.pdf [file SD6.pdf]

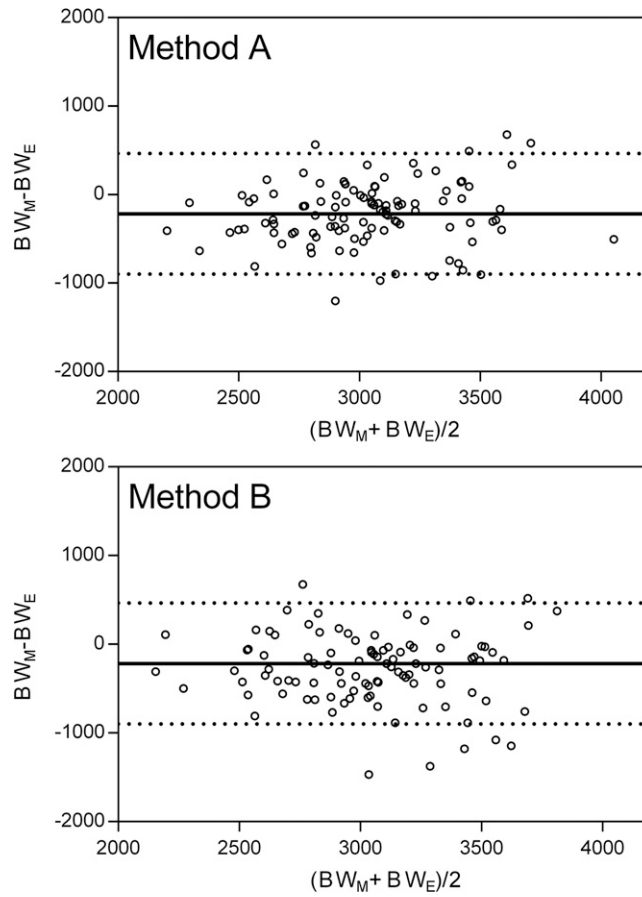

SUPPLEMENTAL FIGURE 1. Bland and Altman analysis to compare two methods ([**A**] constant weight increase versus [**B**] dynamic ratio method) with measured birth weights (BWs). BW predicted by methods A and B overestimated  $BW_M$  by means of 217 and 284 g, respectively.  $BW_E$  = estimated birth weight;  $BW_M$  = measured birth weight.

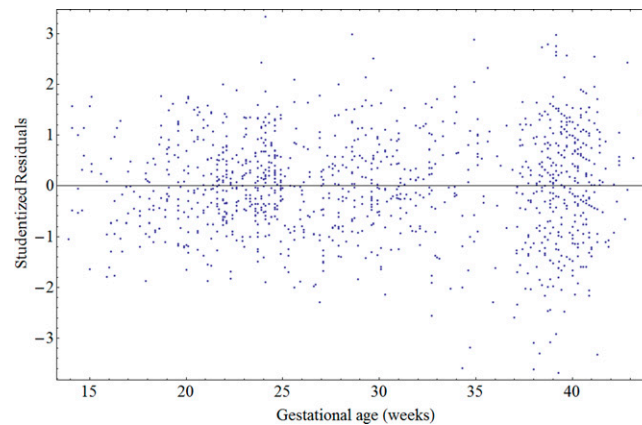

SUPPLEMENTAL FIGURE 2. Studentized residuals of estimated fetal weight/birth weight (log-transformed) across gestational age (weeks) from the fit of the regression model.

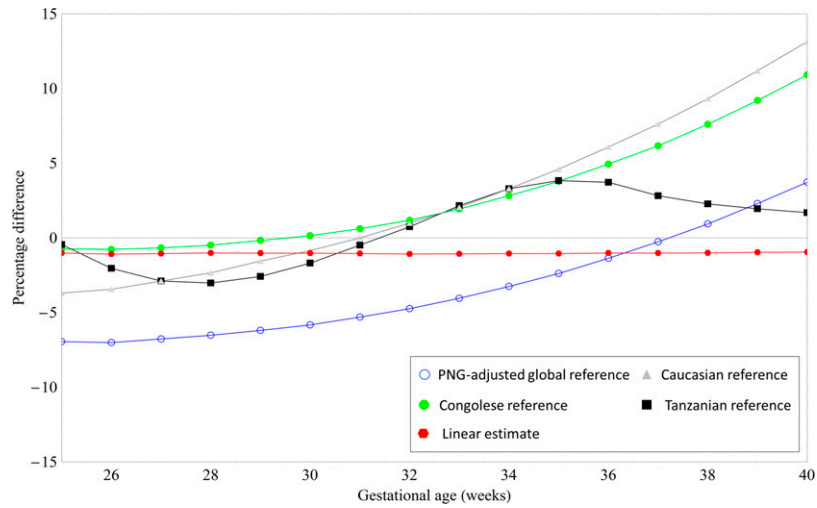

SUPPLEMENTAL FIGURE 3. Percentage difference in the 10th centiles of fetal weight using our model (straight line) and the 10th centile derived from linear instead of logarithmic values (hexagons) assuming a constant variation of 10.9% around the mean. Exponentiation of the SD distorted the 10th centile upward (1%). Note that, when expressed as a percentage of estimated fetal weight, residuals in our cohort were relative constant throughout gestation at  $\pm 10.9\%$  (1 SD). PNG = Papua New Guinea.

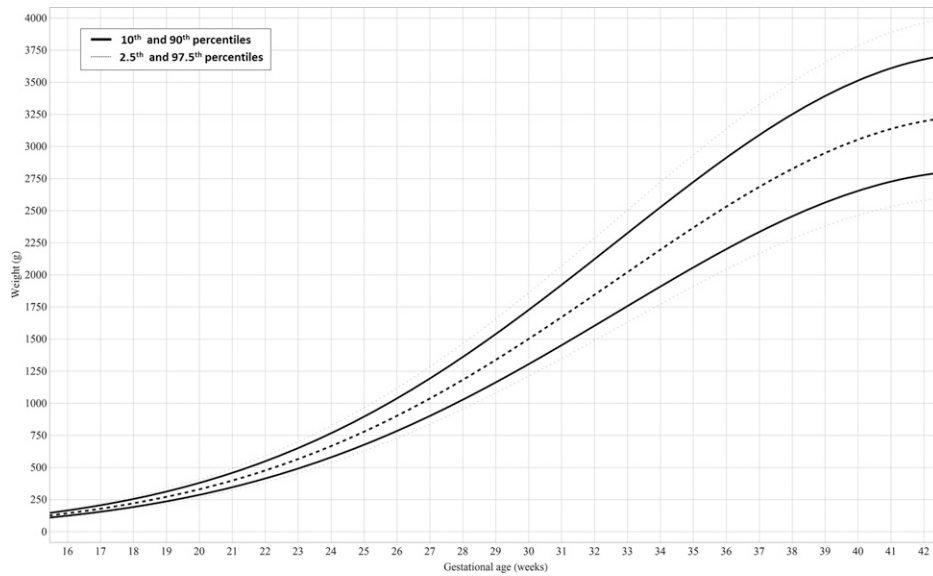

SUPPLEMENTAL FIGURE 4. Fetal weight chart for clinical use in rural Papua New Guinea.

SUPPLEMENTAL TABLE 3

Number of ultrasound-derived estimates of fetal weight ( $N = 788$ ) and fetal biometric measurements (one per woman) used to generate the Papua New Guinea fetal weight nomogram and evaluate fetal size (abdominal circumference and femur length,  $N = 439$ ; head circumference,  $N = 434$ ; Madang Province, Papua New Guinea, 2009–2012)

| Gestational age (weeks) | Estimated fetal weight (g) |                 |       |       | Abdominal circumference (mm) |               |     |     | Femur length (mm) |               |     |     | Head circumference (mm) |               |     |     |
|-------------------------|----------------------------|-----------------|-------|-------|------------------------------|---------------|-----|-----|-------------------|---------------|-----|-----|-------------------------|---------------|-----|-----|
|                         | <i>N</i>                   | Mean $\pm$ SD   | Max   | Min   | <i>N</i>                     | Mean $\pm$ SD | Max | Min | <i>N</i>          | Mean $\pm$ SD | Max | Min | <i>N</i>                | Mean $\pm$ SD | Max | Min |
| 14                      | 12                         | 102 $\pm$ 12    | 79    | 121   | 12                           | 88 $\pm$ 9    | 72  | 99  | 12                | 15 $\pm$ 1    | 12  | 17  | 7                       | 100 $\pm$ 9   | 83  | 107 |
| 15                      | 9                          | 126 $\pm$ 15    | 96    | 142   | 10                           | 99 $\pm$ 9    | 83  | 110 | 10                | 18 $\pm$ 2    | 13  | 21  | 10                      | 115 $\pm$ 5   | 110 | 121 |
| 16                      | 16                         | 152 $\pm$ 20    | 121   | 189   | 14                           | 107 $\pm$ 9   | 91  | 122 | 14                | 20 $\pm$ 2    | 17  | 24  | 13                      | 128 $\pm$ 4   | 122 | 131 |
| 17                      | 16                         | 191 $\pm$ 14    | 169   | 223   | 14                           | 118 $\pm$ 6   | 104 | 127 | 14                | 24 $\pm$ 2    | 22  | 28  | 12                      | 141 $\pm$ 6   | 135 | 157 |
| 18                      | 26                         | 239 $\pm$ 27    | 203   | 310   | 19                           | 134 $\pm$ 7   | 123 | 148 | 19                | 27 $\pm$ 2    | 24  | 32  | 15                      | 154 $\pm$ 5   | 147 | 168 |
| 19                      | 38                         | 301 $\pm$ 27    | 263   | 351   | 22                           | 146 $\pm$ 9   | 132 | 163 | 22                | 31 $\pm$ 2    | 28  | 34  | 23                      | 164 $\pm$ 4   | 159 | 174 |
| 20                      | 43                         | 368 $\pm$ 46    | 276   | 451   | 14                           | 158 $\pm$ 12  | 137 | 176 | 14                | 34 $\pm$ 2    | 30  | 37  | 16                      | 178 $\pm$ 4   | 171 | 183 |
| 21                      | 58                         | 445 $\pm$ 45    | 331   | 583   | 26                           | 173 $\pm$ 8   | 150 | 192 | 26                | 36 $\pm$ 2    | 33  | 41  | 25                      | 190 $\pm$ 3   | 185 | 195 |
| 22                      | 58                         | 506 $\pm$ 46    | 412   | 650   | 19                           | 178 $\pm$ 9   | 164 | 197 | 19                | 39 $\pm$ 2    | 34  | 44  | 19                      | 201 $\pm$ 2   | 198 | 204 |
| 23                      | 67                         | 626 $\pm$ 64    | 497   | 855   | 31                           | 189 $\pm$ 8   | 175 | 203 | 31                | 42 $\pm$ 2    | 39  | 47  | 31                      | 215 $\pm$ 6   | 208 | 243 |
| 24                      | 91                         | 735 $\pm$ 71    | 551   | 973   | 34                           | 204 $\pm$ 10  | 187 | 239 | 34                | 45 $\pm$ 2    | 41  | 48  | 36                      | 227 $\pm$ 6   | 219 | 236 |
| 25                      | 27                         | 812 $\pm$ 107   | 664   | 1,070 | 16                           | 212 $\pm$ 17  | 192 | 249 | 16                | 46 $\pm$ 2    | 43  | 48  | 16                      | 230 $\pm$ 9   | 210 | 241 |
| 26                      | 27                         | 938 $\pm$ 121   | 792   | 1,243 | 15                           | 221 $\pm$ 14  | 202 | 241 | 15                | 48 $\pm$ 2    | 45  | 52  | 16                      | 244 $\pm$ 9   | 225 | 259 |
| 27                      | 43                         | 1,086 $\pm$ 123 | 876   | 1,267 | 26                           | 230 $\pm$ 12  | 209 | 256 | 26                | 51 $\pm$ 3    | 47  | 58  | 27                      | 253 $\pm$ 8   | 239 | 272 |
| 28                      | 40                         | 1,285 $\pm$ 148 | 1,016 | 1,764 | 23                           | 248 $\pm$ 12  | 232 | 273 | 23                | 54 $\pm$ 3    | 46  | 62  | 24                      | 269 $\pm$ 9   | 249 | 288 |
| 29                      | 46                         | 1,464 $\pm$ 144 | 1,188 | 1,665 | 27                           | 257 $\pm$ 12  | 240 | 278 | 27                | 57 $\pm$ 2    | 52  | 60  | 26                      | 276 $\pm$ 7   | 262 | 289 |
| 30                      | 33                         | 1,593 $\pm$ 183 | 1,229 | 1,968 | 15                           | 267 $\pm$ 18  | 234 | 295 | 15                | 58 $\pm$ 2    | 56  | 63  | 14                      | 285 $\pm$ 7   | 275 | 294 |
| 31                      | 31                         | 1,733 $\pm$ 136 | 1,459 | 2,081 | 12                           | 273 $\pm$ 9   | 258 | 286 | 12                | 60 $\pm$ 2    | 56  | 63  | 15                      | 290 $\pm$ 8   | 272 | 301 |
| 32                      | 35                         | 1,950 $\pm$ 209 | 1,491 | 2,330 | 24                           | 286 $\pm$ 13  | 262 | 314 | 24                | 62 $\pm$ 2    | 56  | 67  | 25                      | 296 $\pm$ 7   | 284 | 308 |
| 33                      | 15                         | 2,197 $\pm$ 308 | 1,721 | 2,697 | 14                           | 297 $\pm$ 18  | 266 | 327 | 14                | 63 $\pm$ 3    | 56  | 67  | 13                      | 304 $\pm$ 10  | 279 | 317 |
| 34                      | 19                         | 2,252 $\pm$ 417 | 1,522 | 3,216 | 17                           | 299 $\pm$ 21  | 268 | 346 | 17                | 65 $\pm$ 5    | 54  | 72  | 16                      | 304 $\pm$ 14  | 279 | 329 |
| 35                      | 15                         | 2,558 $\pm$ 282 | 1,962 | 3,177 | 14                           | 312 $\pm$ 15  | 283 | 341 | 14                | 66 $\pm$ 3    | 58  | 70  | 13                      | 314 $\pm$ 14  | 291 | 336 |
| 36                      | 7                          | 2,588 $\pm$ 286 | 2,122 | 2,987 | 7                            | 310 $\pm$ 15  | 286 | 326 | 7                 | 68 $\pm$ 2    | 65  | 72  | 7                       | 315 $\pm$ 14  | 296 | 340 |
| 37*                     | 11                         | 2,681 $\pm$ 397 | 2,025 | 3,286 | 9                            | 321 $\pm$ 24  | 288 | 352 | 9                 | 67 $\pm$ 3    | 62  | 72  | 10                      | 319 $\pm$ 11  | 297 | 330 |
| 38                      | 2                          | 3,087 $\pm$ 25  | 3,069 | 3,105 | 2                            | 333 $\pm$ 14  | 324 | 343 | 2                 | 71 $\pm$ 3    | 69  | 73  | 2                       | 330 $\pm$ 11  | 322 | 338 |
| 39                      | 3                          | 2,975 $\pm$ 413 | 2,538 | 3,360 | 3                            | 324 $\pm$ 19  | 303 | 340 | 3                 | 72 $\pm$ 3    | 69  | 75  | 3                       | 327 $\pm$ 5   | 323 | 333 |

Max = maximum; Min = minimum.

\*In total, 376 birth weights were included in the weight nomogram: 33 birth weights at 37 gestational weeks, 83 birth weights at 38 gestational weeks, 101 birth weights at 39 gestational weeks, 40 birth weights at 40 gestational weeks, 37 birth weights at 41 gestational weeks, and 12 birth weights at 42 gestational weeks.
